# Supplementary material for: Effect of Permissive Dehydration on Induction and Decay of Heat Acclimation, and Temperate Exercise Performance
Source: PubMed Central journal article supplement (PMC5120118; doi:10.3389/fphys.2016.00564), 2016-11-23
Supplement: Table2.pdf [file Table2.pdf]

## 1 Supplementary material

2 **Table 2:** Time course of adaptive response to heat acclimation with (HA<sub>De</sub>), and without (HA<sub>Eu</sub>), permissive dehydration as determined from  
3 standard heat stress test (HST) performed pre, mid, post and 1 week after (decay) heat acclimation. Data are Mean(SD) or Median(range) for  
4 non-parametric RPE data. Significant difference= $P \leq 0.05$ ;  $n=8$  unless otherwise stated. Significant *post-hoc* time effects are denoted by  
5 superscripted letter (<sup>a</sup>=HST<sub>pre</sub> vs. HST<sub>mid</sub>; <sup>b</sup>=HST<sub>pre</sub> vs. HST<sub>post</sub>; <sup>c</sup>=HST<sub>pre</sub> vs. HST<sub>decay</sub>; <sup>d</sup>=HST<sub>mid</sub>; vs. HST<sub>post</sub>; <sup>e</sup>=HST<sub>mid</sub>; vs. HST<sub>decay</sub>;  
6 <sup>f</sup>=HST<sub>post</sub> vs. HST<sub>decay</sub>).

|                                                                                      | HST <sub>pre</sub> |                  | HST <sub>mid</sub> |                  | HST <sub>post</sub> |                  | HST <sub>decay</sub> |                  | Time                  | P value   |             |  |
|--------------------------------------------------------------------------------------|--------------------|------------------|--------------------|------------------|---------------------|------------------|----------------------|------------------|-----------------------|-----------|-------------|--|
|                                                                                      | HA <sub>Eu</sub>   | HA <sub>De</sub> | HA <sub>Eu</sub>   | HA <sub>De</sub> | HA <sub>Eu</sub>    | HA <sub>De</sub> | HA <sub>Eu</sub>     | HA <sub>De</sub> |                       | Condition | Interaction |  |
| <i>Thermal</i>                                                                       |                    |                  |                    |                  |                     |                  |                      |                  |                       |           |             |  |
| Resting $T_{re}$ (°C)                                                                | 37.12(0.23)        | 37.28(0.50)      | 36.75(0.18)        | 37.07(0.46)      | 36.74(0.39)         | 36.96(0.43)      | 36.77(0.43)          | 37.10(0.47)      | 0.000 <sup>ab</sup>   | 0.104     | 0.469       |  |
| Exercise $T_{re}$ (°C)                                                               | 37.89(0.30)        | 37.90(0.49)      | 37.57(0.24)        | 37.73(0.41)      | 37.40(0.20)         | 37.63(0.30)      | 37.46(0.31)          | 37.61(0.48)      | 0.000 <sup>abcd</sup> | 0.360     | 0.489       |  |
| End exercise $T_{re}$ (°C)                                                           | 38.72(0.52)        | 38.58(0.63)      | 38.32(0.439)       | 38.38(0.45)      | 38.00(0.37)         | 38.20(0.33)      | 38.07(0.31)          | 38.13(0.63)      | 0.001 <sup>abcd</sup> | 0.809     | 0.593       |  |
| Resting $\bar{T}_{sk}$ (°C)                                                          | 36.59(0.42)        | 36.40(0.48)      | 36.43(0.37)        | 36.38(0.42)      | 36.15(0.43)         | 36.15(0.44)      | 36.06(0.56)          | 36.10(0.82)      | 0.022 <sup>acd</sup>  | 0.768     | 0.670       |  |
| Exercise $\bar{T}_{sk}$ (°C)                                                         | 37.85(0.47)        | 37.68(0.31)      | 37.47(0.33)        | 37.45(0.33)      | 37.24(0.50)         | 37.20(0.26)      | 37.33(0.48)          | 36.99(0.65)      | 0.001 <sup>abcd</sup> | 0.135     | 0.325       |  |
| End exercise $\bar{T}_{sk}$ (°C)                                                     | 38.24(0.70)        | 37.96(0.66)      | 37.66(0.51)        | 37.61(0.62)      | 37.25(0.73)         | 37.04(0.69)      | 37.40(0.72)          | 37.07(0.77)      | 0.000 <sup>abcd</sup> | 0.096     | 0.851       |  |
| Resting $\bar{T}_b$ (°C)                                                             | 37.07(0.25)        | 37.19(0.49)      | 36.72(0.19)        | 37.00(0.45)      | 36.68(0.38)         | 36.88(0.40)      | 36.70(0.43)          | 37.00(0.45)      | 0.000 <sup>abc</sup>  | 0.137     | 0.372       |  |
| Exercise $\bar{T}_b$ (°C)                                                            | 37.88(0.31)        | 37.88(0.46)      | 37.56(0.23)        | 37.70(0.39)      | 37.39(0.21)         | 37.58(0.28)      | 37.45(0.32)          | 37.55(0.46)      | 0.000 <sup>abcd</sup> | 0.427     | 0.465       |  |
| End exercise $\bar{T}_b$ (°C)                                                        | 38.67(0.51)        | 38.52(0.62)      | 38.25(0.38)        | 38.30(0.46)      | 37.92(0.36)         | 38.09(0.32)      | 37.99(0.30)          | 38.02(0.61)      | 0.000 <sup>abcd</sup> | 0.890     | 0.463       |  |
| <i>Thermoregulatory</i>                                                              |                    |                  |                    |                  |                     |                  |                      |                  |                       |           |             |  |
| Whole-body SR (L·hr <sup>-1</sup> ) <sup>n=7</sup>                                   | 1.54(0.38)         | 1.39(0.35)       | 1.81(0.61)         | 1.63(0.38)       | 1.98(0.62)          | 1.76(0.40)       | 1.69(0.55)           | 1.54(0.36)       | 0.000 <sup>abf</sup>  | 0.143     | 0.808       |  |
| Upper-back SR (L·m <sup>2</sup> ·h <sup>-1</sup> )                                   | 0.54(0.16)         | 0.59(0.17)       | 0.68(0.20)         | 0.54(0.16)       | 0.67(0.23)          | 0.62(0.15)       | 0.63(0.25)           | 0.60(0.20)       | 0.487                 | 0.663     | 0.141       |  |
| Sweat sodium (mmol·L <sup>-1</sup> )                                                 | 104(23)            | 123(40)          | 99(48)             | 82(31)           | 88(50)              | 86(29)           | 107(47)              | 107(40)          | 0.026                 | 0.996     | 0.194       |  |
| Skin blood flow (arbitrary units)                                                    | 279(92)            | 275(124)         | 282(63)            | 287(60)          | 302(72)             | 267(102)         | 258(54)              | 276(94)          | 0.863                 | 0.881     | 0.648       |  |
| Resting $f_c$ (beats·min <sup>-1</sup> ) <sup>n=7</sup>                              | 86(11)             | 84(9)            | 80(9)              | 80(9)            | 75(11)              | 77(9)            | 81(13)               | 80(11)           | 0.007 <sup>b</sup>    | 0.855     | 0.775       |  |
| Exercise $f_c$ (beats·min <sup>-1</sup> )                                            | 150(13)            | 143(12)          | 135(11)            | 135(10)          | 129(10)             | 133(11)          | 135(12)              | 134(14)          | 0.000 <sup>abc</sup>  | 0.818     | 0.153       |  |
| End exercise $f_c$ (beats·min <sup>-1</sup> )                                        | 161(14)            | 155(16)          | 144(16)            | 146(13)          | 139(11)             | 143(12)          | 143(17)              | 145(18)          | 0.000 <sup>bc</sup>   | 0.933     | 0.370       |  |
| Mean exercise PSI (arbitrary units)                                                  | 4.8(1.0)           | 4.3(0.8)         | 4.0(1.0)           | 3.9(0.6)         | 3.7(0.9)            | 3.9(0.5)         | 3.8(0.7)             | 3.6(1.0)         | 0.000 <sup>bc</sup>   | 0.654     | 0.338       |  |
| End exercise PSI (arbitrary units)                                                   | 7.3(1.5)           | 6.7(1.7)         | 5.8(1.4)           | 6.0(1.1)         | 4.9(1.2)            | 5.5(0.7)         | 5.2(1.1)             | 5.4(1.8)         | 0.000 <sup>bcd</sup>  | 0.854     | 0.298       |  |
| Δ Plasma volume (%)                                                                  | 0(0)               | 0(0)             | 8.1(8.2)           | 6.3(4.2)         | 8.1(7.1)            | 5.5(6.3)         | 8.5(8.1)             | 0.3(5.0)         | 0.002 <sup>ab</sup>   | 0.197     | 0.050       |  |
| Δ Blood volume (%)                                                                   | 0(0)               | 0(0)             | 5.3(3.3)           | 3.1(2.3)         | 5.9(2.5)            | 3.0(4.0)         | 7.0(5.6)             | 0.2(2.4)         | 0.002 <sup>ab</sup>   | 0.011     | 0.007       |  |
| Δ Plasma osmolality (pre vs. post exercise) (mOsmo·kg <sup>-1</sup> ) <sup>n=7</sup> | -4(6)              | -4(7)            | -4(9)              | -3(7)            | -4(4)               | -2(4)            | -1(7)                | 1(5)             | 0.466                 | 0.713     | 0.939       |  |
| <i>Biochemical</i>                                                                   |                    |                  |                    |                  |                     |                  |                      |                  |                       |           |             |  |
| Baseline [aldo] <sub>p</sub> (pmol·L <sup>-1</sup> )                                 | 1728(1213)         | 1593(1513)       | 2031(2182)         | 1965(1776)       | 2629(2372)          | 2393(2047)       | -                    | -                | 0.048                 | 0.521     | 0.967       |  |
| Baseline e[HSP70] (pg·mL <sup>-1</sup> ) <sup>n=6</sup>                              | 228(137)           | 223(141)         | 157(42)            | 197(121)         | 160(129)            | 200(95)          | 241(138)             | 237(194)         | 0.467                 | 0.268     | 0.845       |  |
| <i>Metabolic</i>                                                                     |                    |                  |                    |                  |                     |                  |                      |                  |                       |           |             |  |
| External work rate (W)                                                               | 123(14)            | 122(14)          | 123(15)            | 122(14)          | 123(17)             | 120(13)          | 120(14)              | 121(13)          | 0.333                 | 0.786     | 0.818       |  |
| Metabolic heat production (W·kg <sup>-1</sup> )                                      | 7.5(1.7)           | 7.4(1.2)         | 7.4(1.5)           | 7.5(0.6)         | 7.3(1.2)            | 7.2(0.5)         | 6.8(0.7)             | 7.0(1.0)         | 0.186                 | 0.989     | 0.832       |  |
| VO <sub>2</sub> (L·min <sup>-1</sup> )                                               | 2.10(0.24)         | 2.06(0.24)       | 1.99(0.28)         | 2.01(0.24)       | 1.97(0.25)          | 1.95(0.22)       | 1.89(0.21)           | 1.91(0.25)       | 0.007                 | 0.922     | 0.857       |  |
| RER                                                                                  | 0.92(0.07)         | 0.90(0.04)       | 0.94(0.04)         | 0.94(0.03)       | 0.98(0.04)          | 0.93(0.04)       | 0.91(0.05)           | 0.91(0.05)       | 0.011 <sup>ef</sup>   | 0.178     | 0.176       |  |

| <i>Perceptual</i>      |           |           |           |           |           |           |           |           |                                   |       |       |
|------------------------|-----------|-----------|-----------|-----------|-----------|-----------|-----------|-----------|-----------------------------------|-------|-------|
| RPE                    | 13(5)     | 13(5)     | 13(3)     | 12(3)     | 12(3)     | 12(4)     | 12(4)     | 11(3)     | HAEu: $P=0.024$ ; HADe: $P=0.044$ |       |       |
| Thermal comfort (cm)   | 6.1(4.1)  | 6.8(4.6)  | 6.7(4.2)  | 8.1(2.8)  | 9.0(3.5)  | 9.4(3.1)  | 8.8(3.9)  | 9.6(3.2)  | 0.000 <sup>bcd</sup>              | 0.445 | 0.764 |
| Thermal sensation (cm) | 16.5(1.6) | 16.1(2.1) | 16.3(1.7) | 15.3(1.5) | 15.3(1.5) | 15.0(1.7) | 15.0(1.6) | 14.4(1.8) | 0.000 <sup>bce</sup>              | 0.244 | 0.432 |

- 7  $T_{re}$ =rectal temperature;  $\bar{T}_{sk}$ =mean skin temperature;  $\bar{T}_b$ =mean body temperature; SR=sweat rate; PSI=physiological strain index; [aldo]<sub>p</sub>=plasma  
8 aldosterone concentration; e[HSP70]=plasma heat shock protein 70 concentration;  $\dot{V}O_2$ =rate of oxygen uptake; RER=respiratory exchange  
9 ratio; RPE=rating of perceived exertion.
