# Supplementary material for: Effect of Permissive Dehydration on Induction and Decay of Heat Acclimation, and Temperate Exercise Performance
Source: PubMed Central journal article supplement (PMC5120118; doi:10.3389/fphys.2016.00564), 2016-11-23
Supplement: Table3.pdf [file Table3.pdf]

## Supplementary Material

**Table 3:** Mean(SD) thermo-physiological responses to exercise in temperate conditions before and after heat acclimation, with (HA<sub>De</sub>) and without (HA<sub>Eu</sub>) permissive dehydration (n=8). Data refer to average during 20 minute exercise period, unless otherwise stated.

\*=significant difference ( $P \leq 0.05$ ).

|                                                    | Pre-HA           |                  | Post-HA          |                  | Time   | P value<br>Condition | Interaction |
|----------------------------------------------------|------------------|------------------|------------------|------------------|--------|----------------------|-------------|
|                                                    | HA <sub>Eu</sub> | HA <sub>De</sub> | HA <sub>Eu</sub> | HA <sub>De</sub> |        |                      |             |
| <i>Thermal</i>                                     |                  |                  |                  |                  |        |                      |             |
| Resting $T_{re}$ (°C)                              | 37.29(0.25)      | 37.43(0.30)      | 37.11(0.27)      | 37.21(0.33)      | 0.048* | 0.128                | 0.777       |
| Exercise $T_{re}$ (°C)                             | 37.36(0.28)      | 37.50(0.27)      | 37.18(0.23)      | 37.23(0.30)      | 0.026* | 0.188                | 0.388       |
| End exercise $T_{re}$ (°C)                         | 37.48(0.23)      | 37.68(0.23)      | 37.35(0.22)      | 37.38(0.25)      | 0.026* | 0.110                | 0.147       |
| Resting $\bar{T}_{sk}$ (°C)                        | 31.54(0.53)      | 32.06(0.77)      | 32.10(0.65)      | 31.88(0.56)      | 0.325  | 0.453                | 0.089       |
| Exercise $\bar{T}_{sk}$ (°C)                       | 29.96(0.58)      | 30.17(1.15)      | 29.98(0.53)      | 29.83(0.67)      | 0.599  | 0.901                | 0.584       |
| End exercise $\bar{T}_{sk}$ (°C)                   | 29.93(0.78)      | 29.91(1.28)      | 29.65(0.54)      | 29.56(0.65)      | 0.297  | 0.883                | 0.910       |
| Resting $T_b$ (°C)                                 | 36.71(0.21)      | 36.89(0.34)      | 36.61(0.28)      | 36.67(0.34)      | 0.101  | 0.158                | 0.415       |
| Exercise $T_b$ (°C)                                | 36.62(0.26)      | 36.77(0.34)      | 36.46(0.24)      | 36.49(0.33)      | 0.054  | 0.277                | 0.404       |
| End exercise $T_b$ (°C)                            | 36.72(0.20)      | 36.90(0.32)      | 36.58(0.22)      | 36.60(0.27)      | 0.047* | 0.287                | 0.196       |
| <i>Thermoregulatory</i>                            |                  |                  |                  |                  |        |                      |             |
| Upper-back SR (L·m <sup>2</sup> ·h <sup>-1</sup> ) | 0.15(0.08)       | 0.17(0.08)       | 0.16(0.07)       | 0.12(0.05)       | 0.402  | 0.850                | 0.096       |
| Skin blood flow (arbitrary units)                  | 61(32)           | 59(20)           | 66(34)           | 75(22)           | 0.044* | 0.817                | 0.374       |
| Resting $f_c$ (beats·min <sup>-1</sup> )           | 78(12)           | 79(11)           | 72(13)           | 69(13)           | 0.007* | 0.639                | 0.369       |
| Exercise $f_c$ (beats·min <sup>-1</sup> )          | 109(7)           | 114(9)           | 104(9)           | 104(6)           | 0.015* | 0.487                | 0.072       |
| <i>Metabolic</i>                                   |                  |                  |                  |                  |        |                      |             |
| VO <sub>2</sub> (L·min <sup>-1</sup> )             | 1.85(0.24)       | 1.95(0.25)       | 1.89(0.22)       | 1.83(0.22)       | 0.091  | 0.678                | 0.065       |
| RER                                                | 0.91(0.03)       | 0.88(0.04)       | 0.91(0.04)       | 0.89(0.03)       | 0.447  | 0.033                | 0.618       |

$T_{re}$ =rectal temperature;  $\bar{T}_{sk}$ =mean skin temperature;  $T_b$ =mean body temperature; SR=sweat rate; VO<sub>2</sub>=rate of oxygen uptake; RER=respiratory exchange ratio.
